# Supplementary material for: Efficiency of CD19 chimeric antigen receptor-modified T cells for treatment of B cell malignancies in phase I clinical trials: a meta-analysis
Source: PubMed Central journal article supplement (PMC4741817; doi:10.18632/oncotarget.5582), 2015-09-10
Supplement: oncotarget-06-33961-s001.pdf [file oncotarget-06-33961-s001.pdf]

# Efficiency of CD19 Chimeric Antigen Receptor-Modified T Cells for treatment of B Cell Malignancies in Phase I Clinical Trials: a Meta-Analysis

## Supplementary Material

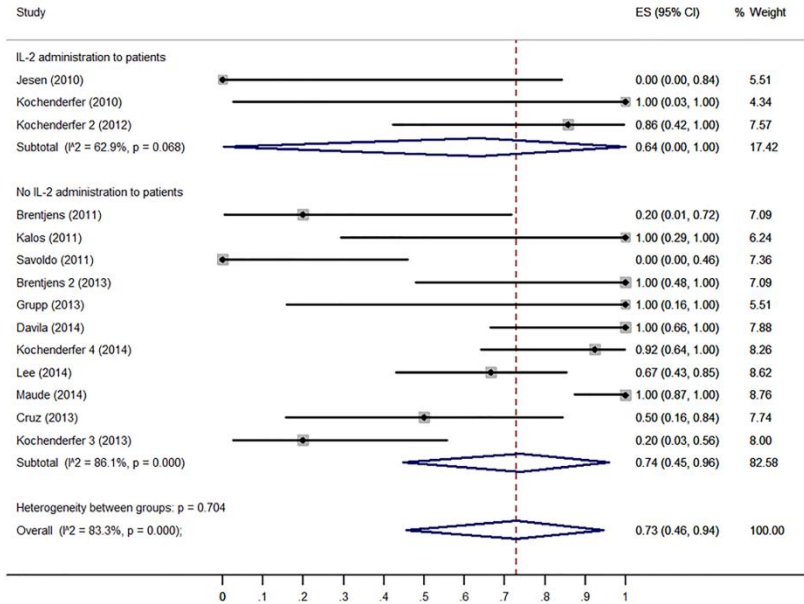

Supplemental Figure 1: Forest plot for response rate and confidence intervals in patients with/without IL-2 administration to patient in the meta-analysis.

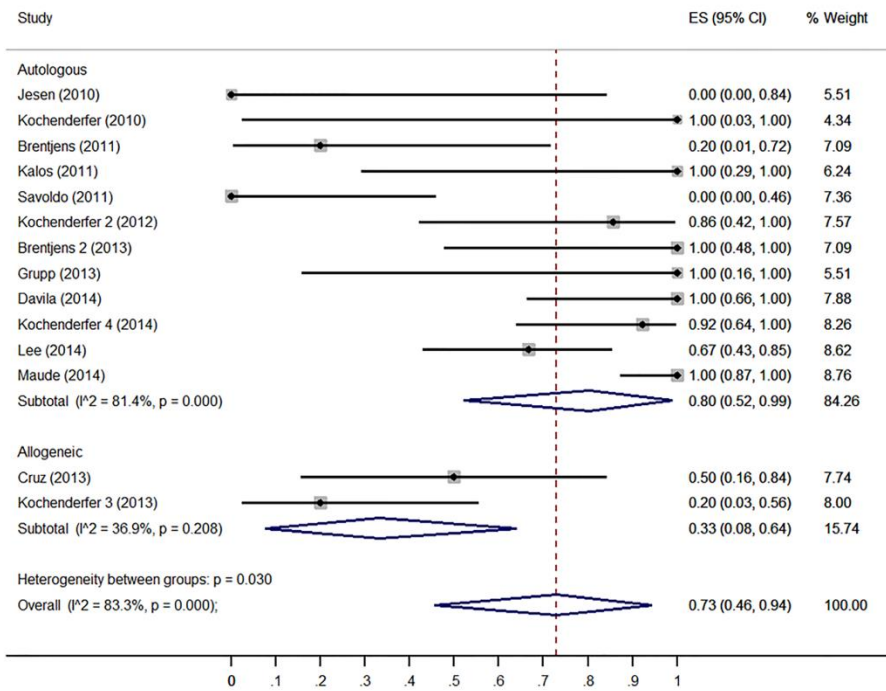

Supplemental Figure 2: Forest plot for response rate and confidence intervals in patients received different original T cell in the meta-analysis

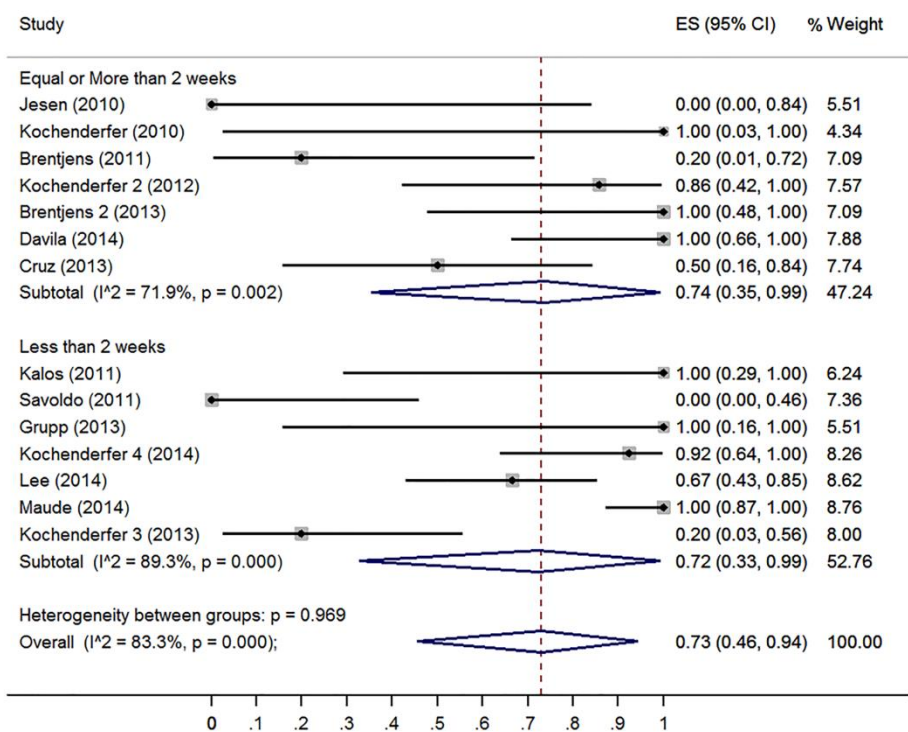

Supplemental Figure 3: Forest plot for response rate and confidence intervals in patients with different T cell culture time in the meta-analysis.

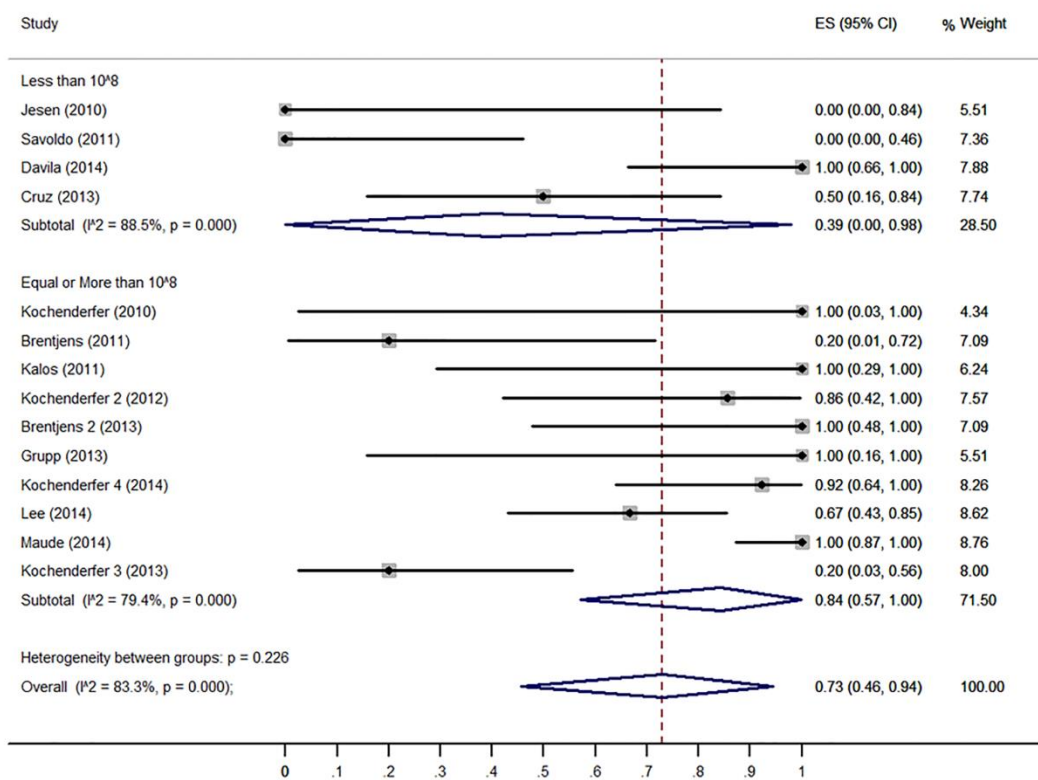

Supplemental Figure 4: Forest plot for response rate and confidence intervals in patients with different infused CAR T+ cell number in the meta-analysis.

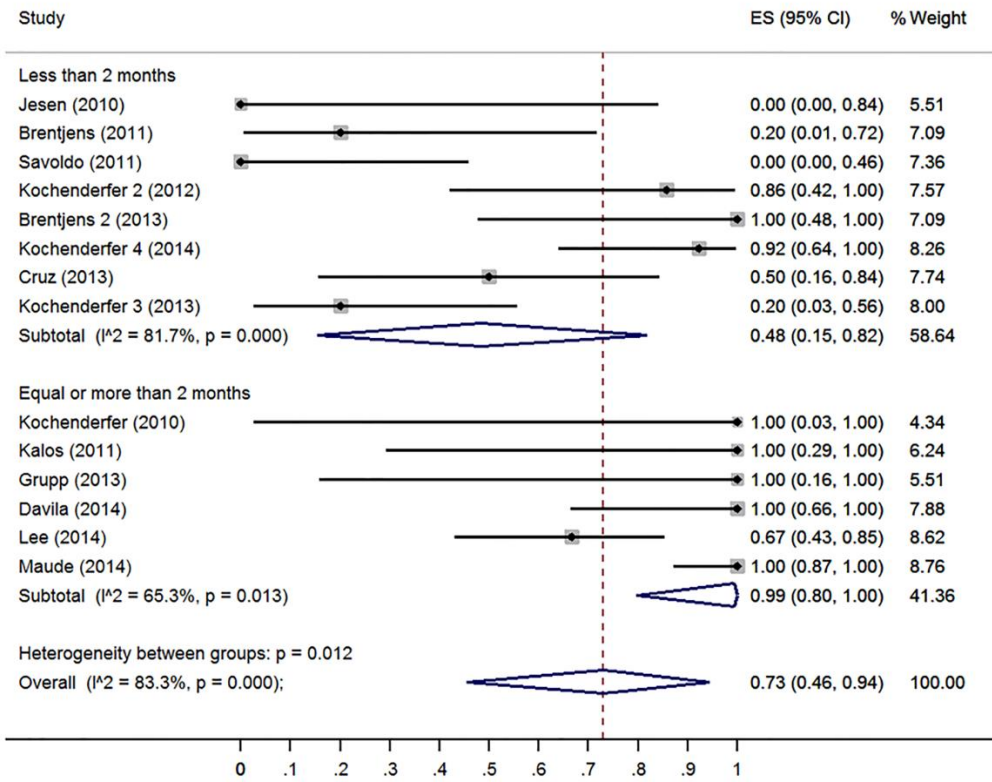

Supplemental Figure 5: Forest plot for response rate and confidence intervals in patients with different CAR T+ cell persistence time in the meta-analysis.

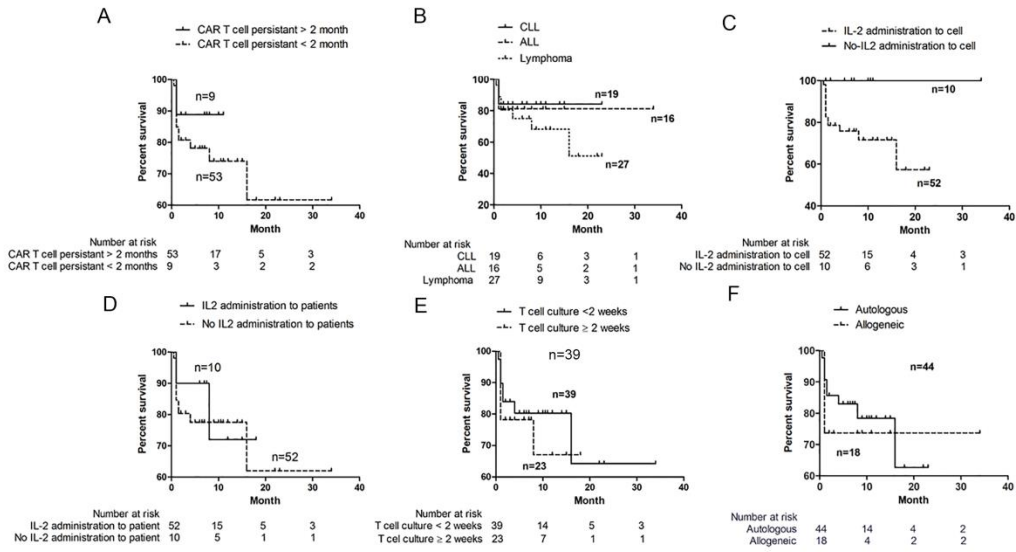

Supplemental Figure 6: Progression-free survival (PFS) curves.

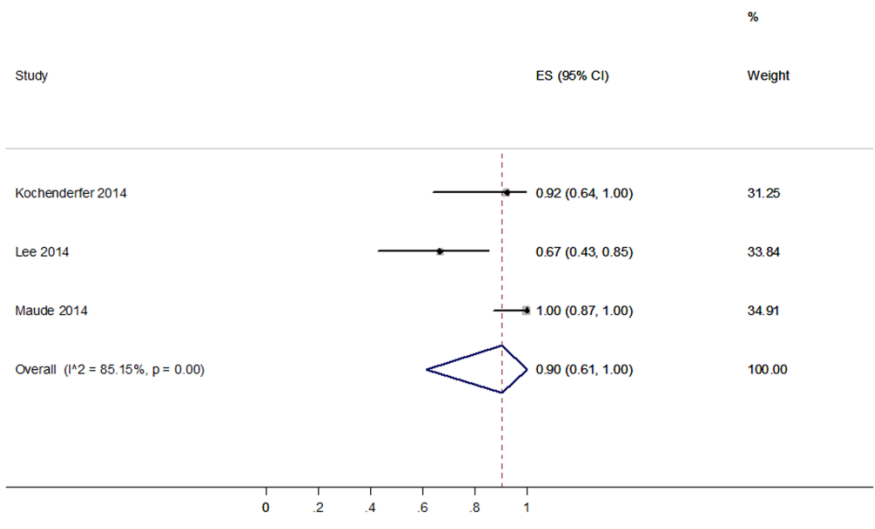

Supplemental Figure 7: Forest plot for response rates and confidence intervals in 3 studies with more than ten patients.

**Supplemental Table 2:** Meta-regression of the association between lymphodepletion regimens and clinical outcomes

| Lymphodepletion regimen              | Co-efficiency. | 95% CI      | P value |
|--------------------------------------|----------------|-------------|---------|
| Fludarabine + IL-2                   | 1.00           | -0.31, 2.31 | 0.11    |
| Cyclophosphamide + Fudarabine + IL-2 | -0.12          | -1.60, 1.42 | 0.86    |
| Cyclophosphamide                     | -0.20          | -1.61-1.21  | 0.740   |
| Cyclophosphamide + Fudarabine        | -0.13          | -1.48, 1,21 | 0.82    |
| Pentostatin + cyclophosphamide       | NA*            | NA*         | NA*     |

Note: \* There was only one trail in “Pentostatin + cyclophosphamide” group. The Meta regression can’t show the pooled regression results for this group.
